# Supplementary material for: Energetic costs of locomotion in bears: is plantigrade locomotion energetically economical?
Source: Oxford University Press journal article supplement (doi:10.1242/jeb.175372), 2018-06-15
Supplement: jeb175372supp.pdf [file jeb175372supp.pdf]

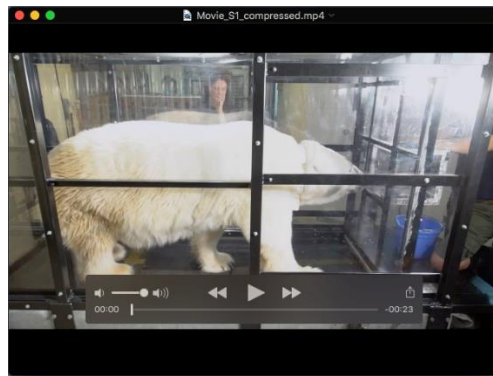

Movie 1. High-speed video ( $120 \text{ frames s}^{-1}$ ) showing the plantigrade walking gait of an adult female polar bear walking on a treadmill at  $2 \text{ km h}^{-1}$ .

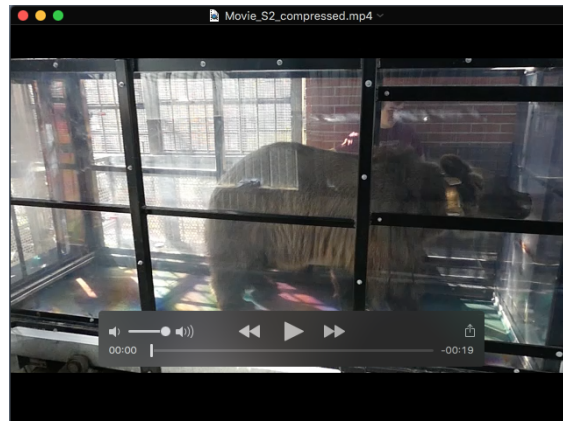

Movie 2. High-speed video ( $120 \text{ frames s}^{-1}$ ) showing the plantigrade walking gait of an adult female grizzly bear walking on a treadmill at  $2.8 \text{ km h}^{-1}$ .
